# Supplementary material for: Facile synthesis of SAPO-34 nanocrystallites with excellent performance for the dehydration of carbohydrates to 5-hydroxymethylfurfural
Source: Royal Society of Chemistry journal article supplement (doi:10.1039/d2gc04301g), 2023-01-01
Supplement: d2gc04301g1.pdf [file d2gc04301g1.pdf]

## Supplementary Information

### **Facile synthesis of SAPO-34 nanocrystallites with excellent performance for carbohydrates dehydration to 5-hydroxymethylfurfural**

Pengfei Wu,<sup>a,b</sup> Miao Yang,<sup>b</sup> Jifeng Pang,<sup>a</sup> Dong Fan,<sup>b</sup> Lei Song,<sup>a</sup> Tantan Sun,<sup>c</sup> Mingyuan Zheng,<sup>a,\*</sup> Peng Tian,<sup>b,\*\*</sup> and Tao Zhang<sup>a</sup>

<sup>a</sup> CAS Key Laboratory of Science and Technology on Applied Catalysis, Dalian Institute of Chemical Physics, Chinese Academy of Sciences, Dalian 116023, China

<sup>b</sup> National Engineering Laboratory for Methanol to Olefins, Dalian National Laboratory for Clean Energy, Dalian Institute of Chemical Physics, Chinese Academy of Sciences, Dalian 116023, China

<sup>c</sup> Key Laboratory of Biomass Chemical Engineering of Ministry of Education, College of Chemical and Biological Engineering, Zhejiang University, Hangzhou 311215, China

**Table S1.** Comparison of textural properties and compositions of nanosized/hierarchical SAPO-34 catalysts directed by amine templates

| Entry | Sample                    | Method                                              | Microporous template <sup>a</sup> | Si content | Textural properties <sup>b</sup> |                    |                  |                    |                   | Ref. |
|-------|---------------------------|-----------------------------------------------------|-----------------------------------|------------|----------------------------------|--------------------|------------------|--------------------|-------------------|------|
|       |                           |                                                     |                                   |            | S <sub>BET</sub>                 | S <sub>micro</sub> | S <sub>ext</sub> | V <sub>micro</sub> | V <sub>meso</sub> |      |
| 1     | S <sub>H3</sub>           | soft-template PDADMAC                               | MOR                               | 0.13       | 505                              | 426                | 79               | 0.18               | 0.31              | 1    |
| 2     | S <sub>H3</sub>           | soft-template polyethylene glycol                   | TEA                               | 0.08       | 513                              | 320                | 193              | 0.15               | 0.31              | 2    |
| 3     | SP34-MS                   | soft-template TPOAC                                 | DEA                               | 0.15       | 567                              | 455                | 112              | 0.21               | 0.17              | 3    |
| 4     | S <sub>2</sub>            | soft-template polyethylene glycol                   | MOR                               | 0.1        | 519                              | 360                | 159              | 0.16               | 0.2               | 4    |
| 5     | S-DEA-1/5                 | soft-template DPHAB                                 | DEA                               | 0.11       | 622                              | 597                | 25               | 0.28               | 0.02              | 5    |
| 6     | SP34-M3                   | soft-template PZPMS                                 | TEA                               | 0.12       | 604                              | 497                | 107              | 0.24               | 0.17              | 6    |
| 7     | S <sub>H2</sub>           | soft-template TPOAC                                 | MOR                               | 0.16       | 507                              | 384                | 123              | 0.18               | 0.26              | 7    |
| 8     | S <sub>2</sub>            | soft-template polyacrylamide                        | TEA                               | 0.08       | 652                              | 615                | 37               | 0.23               | 0.12              | 8    |
| 9     | hierarchical SAPO-34-10wt | hard-template rapeseed pollen                       | TEA                               | -          | 683                              | 609                | 74               | 0.24               | 0.1               | 9    |
| 10    | S-1                       | nitric acid post-treatment                          | TEA                               | 0.13       | 671                              | 638                | 33               | 0.25               | 0.01              | 10   |
| 11    | HZ-SAPO-34-Mor-60         | HF-NH <sub>4</sub> F post-treatment                 | MOR                               | 0.16       | 509                              | 471                | 38               | 0.23               | 0.02              | 11   |
| 12    | Sample 1.1                | HF in-situ etching                                  | TEA                               | 0.09       | 544                              | 533                | 11               | 0.26               | -                 | 12   |
| 13    | SAPO-34 US30              | NH <sub>4</sub> F post-treatment                    | TEA                               | 0.04       | 488                              | 416                | 72               | 0.21               | 0.24              | 13   |
| 14    | SP34-S-2.0                | seed assistant                                      | MOR                               | 0.16       | 600                              | 580                | 20               | 0.28               | -                 | 14   |
| 15    | S <sub>H3</sub>           | seed assistant                                      | TEA                               | 0.1        | 556                              | 536                | 20               | 0.27               | -                 | 15   |
| 16    | S34-0.08                  | NaHCO <sub>3</sub> assistant                        | TEA                               | 0.08       | 733                              | 675                | 58               | 0.24               | 0.08              | 16   |
| 17    | SP34-HEEP-s               | amine HEEP assistant                                | TEA                               | 0.09       | 583                              | 548                | 35               | 0.27               | 0.12              | 17   |
| 18    | SAPO-34-H1                | vapor-phase transport method                        | TEA                               | 0.12       | 712                              | 679                | 33               | 0.25               | 0.12              | 18   |
| 19    | Sample 2                  | post-synthesis milling and recrystallization method | TEA                               | 0.14       | 530                              | 479                | 51               | 0.22               | 0.2               | 19   |
| 20    | S <sub>PT</sub> -80-12    | mother liquid post-treatment                        | TEA                               | 0.09       | 574                              | 516                | 58               | 0.24               | 0.03              | 20   |

<sup>a</sup> TEA: triethylamine, MOR: morpholine, DEA: diethylamine. <sup>b</sup> S<sub>BET</sub>: BET surface area, S<sub>micro</sub>: micropore surface area, S<sub>ext</sub>: external surface area, V<sub>micro</sub>: micropore volume, V<sub>meso</sub>: mesopore volume

1. G. Guo, Q. Sun, N. Wang, R. Bai and J. Yu, *Chem. Commun.* , 2018, **54**, 3697-3700.
2. Q. Sun, N. Wang, G. Guo, X. Chen and J. Yu, *J. Mater. Chem. A*, 2015, **3**, 19783-19789.
3. C. Wang, M. Yang, M. Li, S. Xu, Y. Yang, P. Tian and Z. Liu, *Chem. Commun.* , 2016, **52**, 6463-6466.
4. S. Zhang, Z. Wen, L. Yang, C. Duan, X. Lu, Y. Song, Q. Ge and Y. Fang, *Microporous Mesoporous Mater.* , 2019, **274**, 220-226.
5. C. Wang, M. Yang, W. Zhang, X. Su, S. Xu, P. Tian and Z. Liu, *RSC Adv.*, 2016, **6**, 47864-47872.
6. P. Wu, M. Yang, W. Zhang, S. Xu, P. Guo, P. Tian and Z. Liu, *Chem Commun.* , 2017, **53**, 4985-4988.
7. Q. Sun, N. Wang, D. Xi, M. Yang and J. Yu, *Chem. Commun.* , 2014, **50**, 6502-6505.
8. L. Han, L. Guo, S. Xue, Z. Wang, T. Lu, J. Xu, Y. Zhan and J. Wang, *Microporous Mesoporous Mater.* , 2021, **311**, 110676-110683.
9. J. Gong, C. Wang, C. Zeng and L. Zhang, *Microporous Mesoporous Mater.* , 2016, **221**, 128-136.
10. S. Ren, G. Liu, X. Wu, X. Chen, M. Wu, G. Zeng, Z. Liu and Y. Sun, *Chin. J. Catal.* , 2017, **38**, 123-130.
11. X. Chen, D. Xi, Q. Sun, N. Wang, Z. Dai, D. Fan, V. Valtchev and J. Yu, *Microporous Mesoporous Mater.* , 2016, **234**, 401-408.
12. D. Xi, Q. Sun, J. Xu, M. Cho, H. S. Cho, S. Asahina, Y. Li, F. Deng, O. Terasaki and J. Yu, *J. Mater. Chem. A*, 2014, **2**, 17994-18004.
13. X. Chen, A. Vicente, Z. Qin, V. Ruaux, J. P. Gilson and V. Valtchev, *Chem. Commun.* , 2016, **52**, 3512-3515.
14. G. Chen, Q. Sun and J. Yu, *Chem. Commun.* , 2017, **53**, 13328-13331.
15. Q. Sun, N. Wang, R. Bai, X. Chen and J. Yu, *J. Mater. Chem. A*, 2016, **4**, 14978-14982.
16. Y. He, Y. Zhu, Y. Duan, M. Zhang and J. Jiang, *Cryst. Growth Des.* , 2019, **20**, 17-23.
17. P. Wu, M. Yang, L. Sun, S. Zeng, S. Xu, P. Tian and Z. Liu, *Chem Commun.* , 2018, **54**, 11160-11163.
18. Y. Liang, B. Gao, L. Zhou, X. Yang, T. Lu, H. Yao and Y. Su, *J. Mater. Chem. A*, 2021, **9**, 1859-1867.
19. M. Yang, P. Tian, C. Wang, Y. Yuan, Y. Yang, S. Xu, Y. He and Z. Liu, *Chem. Commun.* , 2014, **50**, 1845-1847.
20. J. Han, G. Yang, Y. Zou, X. Chen and V. Valtchev, *Adv. Mater. Interfaces*, 2021, **8**, 2002029-2002037.

**Table S2.** Thermal analysis results of the samples

| Sample | Weight loss (%)                        |                                  |
|--------|----------------------------------------|----------------------------------|
|        | Physical absorbed water<br>(RT-200 °C) | Organic species (200-<br>900 °C) |
| SP-M1  | 6.7                                    | 12.6                             |
| SP-M2  | 8.9                                    | 13.9                             |
| SP-M3  | 9.7                                    | 16.0                             |
| SP-M4  | 9.4                                    | 16.3                             |
| SP-M5  | 10.5                                   | 16.9                             |

**Table S3.** Textural properties of the aluminosilicate zeolites

| Sample | Surface area (m <sup>2</sup> /g) |                                 |                                 | Pore volume (cm <sup>3</sup> /g) |                                |
|--------|----------------------------------|---------------------------------|---------------------------------|----------------------------------|--------------------------------|
|        | S <sub>BET</sub> <sup>a</sup>    | S <sub>micro</sub> <sup>b</sup> | S <sub>exter</sub> <sup>b</sup> | V <sub>micro</sub> <sup>b</sup>  | V <sub>meso</sub> <sup>c</sup> |
| ZSM-5  | 323                              | 227                             | 96                              | 0.11                             | 0.05                           |
| MCM-22 | 499                              | 357                             | 142                             | 0.18                             | 0.58                           |
| Y      | 667                              | 594                             | 93                              | 0.28                             | 0.09                           |
| Beta   | 570                              | 403                             | 167                             | 0.19                             | 0.33                           |

<sup>a</sup> Total surface area is determined by the BET equation. <sup>b</sup> Micropore surface area, micropore volume and external surface area are determined by the t-plot method. <sup>c</sup>

Mesopore volume is determined from the adsorption isotherm by the BJH method.

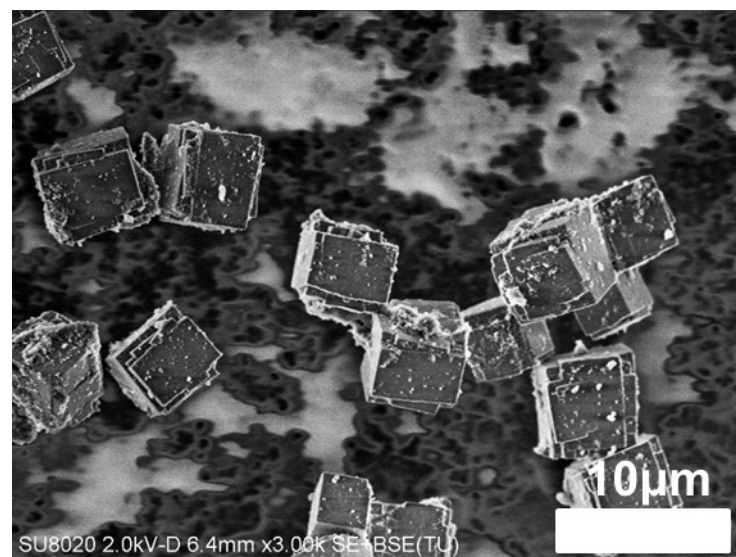

**Fig. S1** SEM image of calcined SP-C.

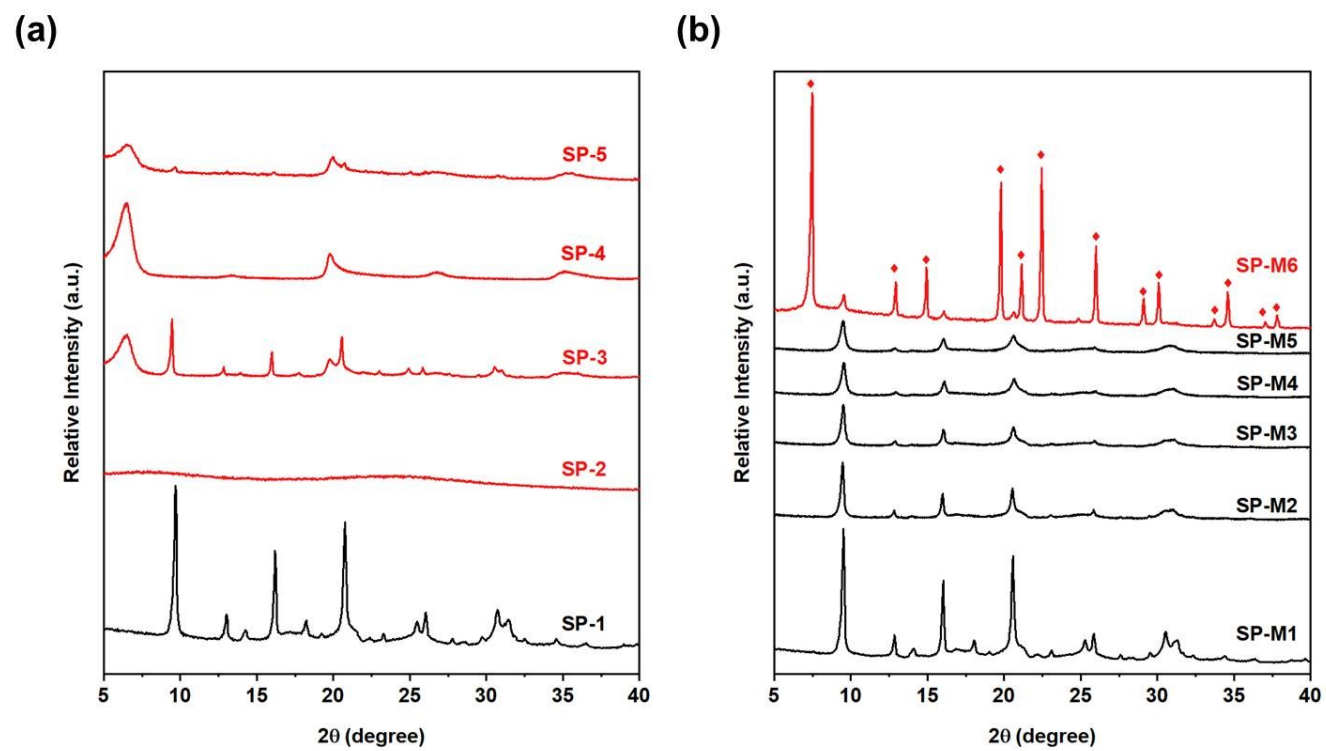

Fig. S2 XRD patterns of the as-synthesized SP-n (a) and SP-Mn (b). Diamonds indicate the AFI phase.

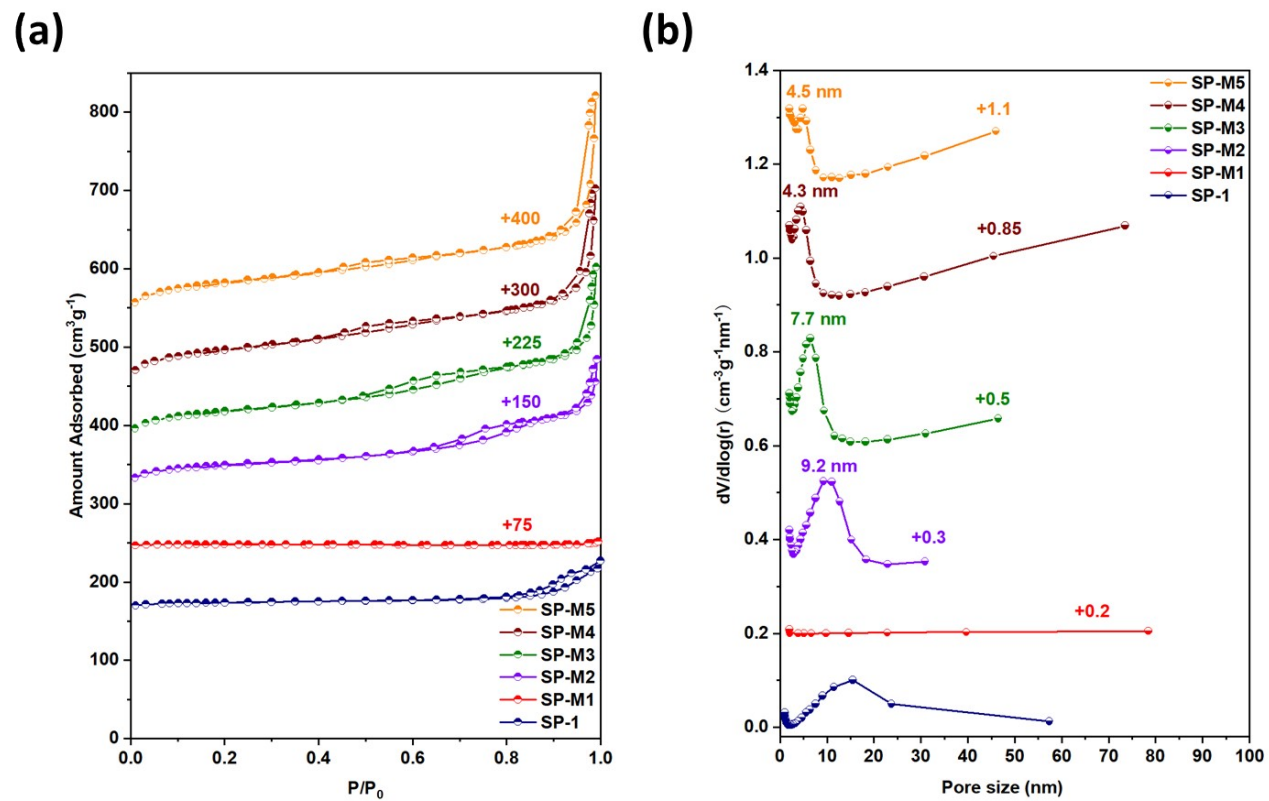

Fig. S3  $\text{N}_2$  sorption isotherms (a) and pore size distributions (b) of the samples.



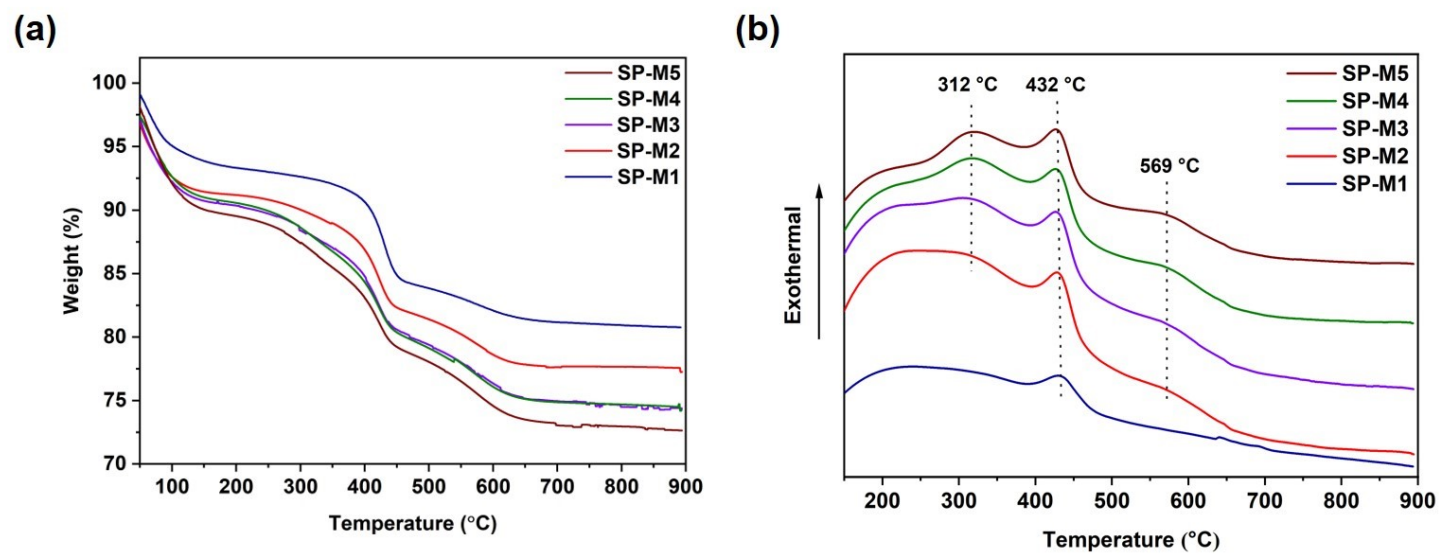

Fig. S4 TG (a) and DTA (b) curves of the as-synthesized samples.

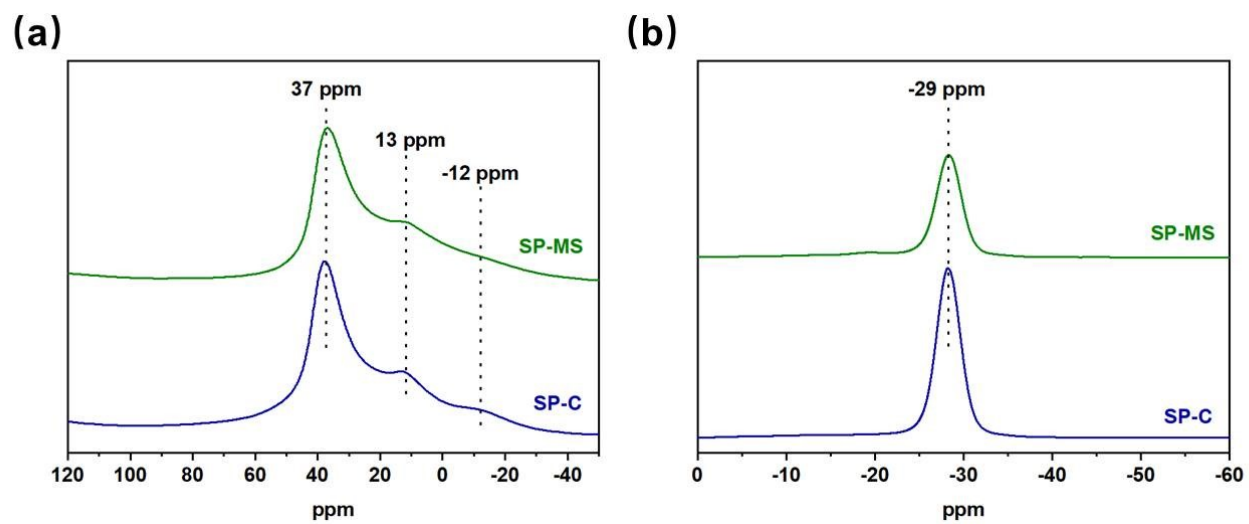

**Fig. S5**  $^{27}\text{Al}$  MAS NMR spectra (a) and  $^{31}\text{P}$  MAS NMR spectra (b) of the as-synthesized samples.

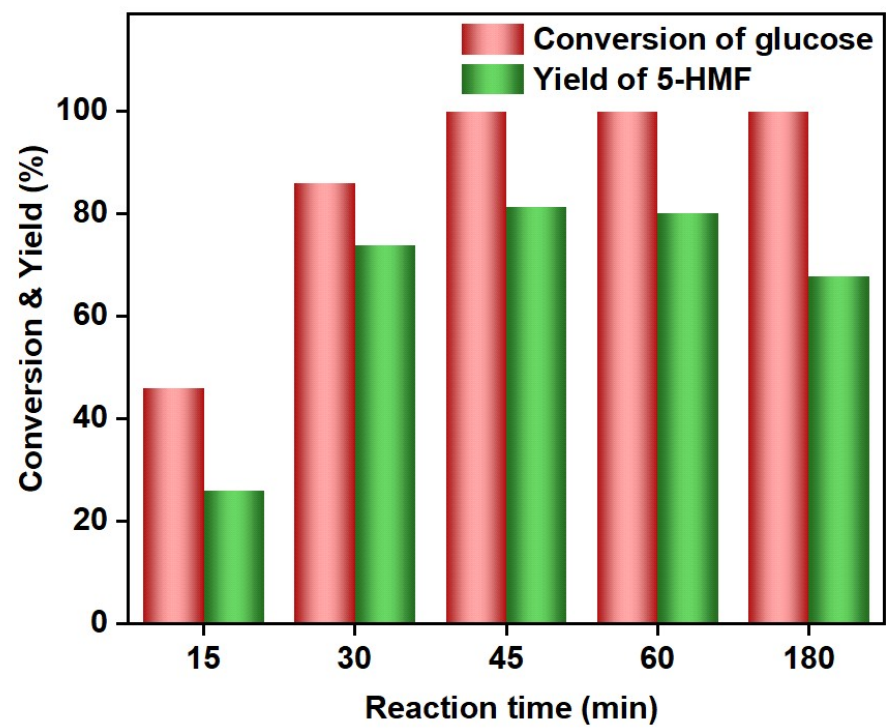

**Fig. S6** Effect of reaction time on conversion of glucose and 5-HMF yield. Reaction condition: 0.1 g glucose, 0.1 g SP-MS, 2 mL NaCl-H<sub>2</sub>O + 8 mL MIBK, 170 °C.

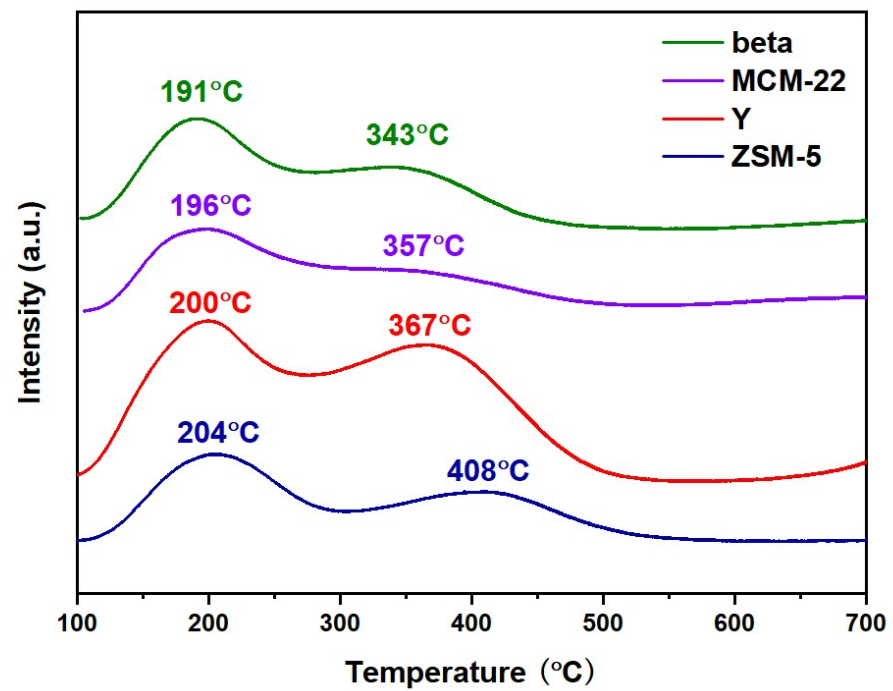

Fig. S7 NH<sub>3</sub>-TPD profiles of aluminosilicate zeolites.

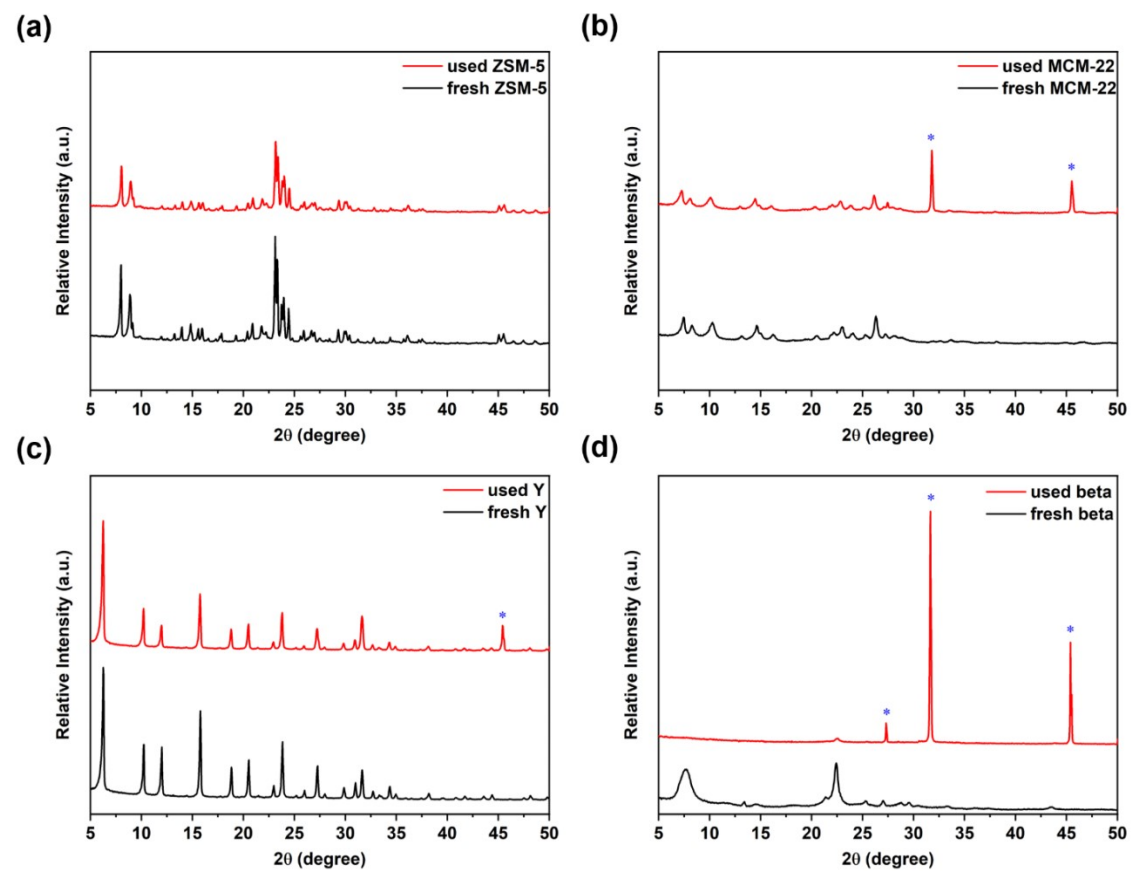

**Fig. S8** XRD patterns of the fresh and used catalysts. Asterisk indicate the NaCl. All the used samples were washed with deionized water and dried overnight.

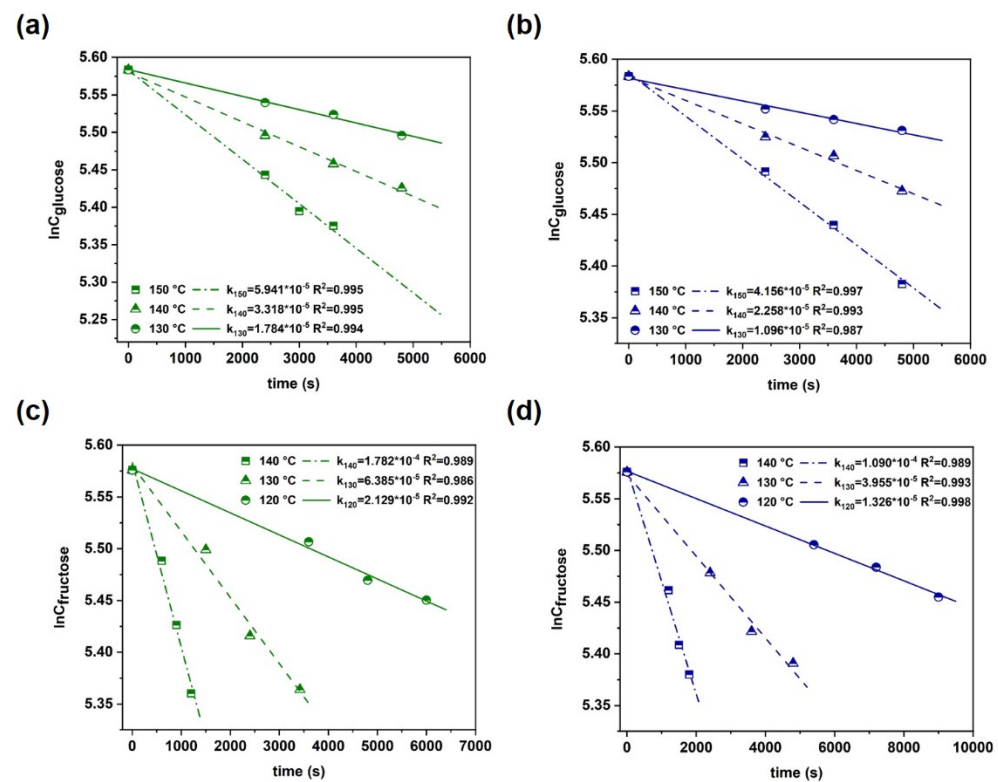

**Fig. S9** First order kinetic fit for the conversion of glucose over SP-MS (a), SP-C (b), and fructose over SP-MS (c), SP-C (d). Reaction condition: 0.1 g substrate, 2 mL saturated solution of NaCl + 8 mL MIBK, 0.1 g catalyst for glucose conversion, 0.02g catalyst for fructose conversion.
